# Supplementary material
Source: PubMed Central journal article supplement (PMC1559506)

## Supplementary Data

for

David Crich\* and Mitesh Patel

Department of Chemistry, University of Illinois at Chicago, 845 West Taylor Street, Chicago  
Illinois 60607-7061, USA

### Table of Contents

| Compounds                                                                                                                                                                                                                                | Spectra  |
|------------------------------------------------------------------------------------------------------------------------------------------------------------------------------------------------------------------------------------------|----------|
| Methyl 6- <i>O</i> -(2- <i>O</i> -benzyl-3,4- <i>O</i> -carbonyl- $\alpha$ -L-rhamnopyranosyl)-2,3,4-tri- <i>O</i> -benzyl- $\alpha$ -D-glucopyranoside (6 $\alpha$ )                                                                    | S-3, 4   |
| Methyl 6- <i>O</i> -(2- <i>O</i> -benzyl-3,4- <i>O</i> -carbonyl- $\beta$ -L-rhamnopyranosyl)-2,3,4-tri- <i>O</i> -benzyl- $\alpha$ -D-glucopyranoside (6 $\beta$ )                                                                      | S-5, 6   |
| Methyl 2,3,6-tri- <i>O</i> -benzyl-4- <i>O</i> -(2- <i>O</i> -benzyl-3,4- <i>O</i> -carbonyl- $\alpha$ -L-rhamnopyranosyl)- $\alpha$ -D-glucopyranoside (8 $\alpha$ )                                                                    | S-7, 8   |
| Methyl 2,3,6-tri- <i>O</i> -benzyl-4- <i>O</i> -(2- <i>O</i> -benzyl-3,4- <i>O</i> -carbonyl- $\beta$ -L-rhamnopyranosyl)- $\alpha$ -D-glucopyranoside (8 $\beta$ )                                                                      | S-9, 10  |
| Methyl 4- <i>O</i> -(2- <i>O</i> -benzyl-3,4- <i>O</i> -carbonyl- $\alpha$ -L-rhamnopyranosyl)-2,3- <i>O</i> -isopropylidene- $\alpha$ -L-rhamnopyranoside(10 $\alpha$ )                                                                 | S-11, 12 |
| Methyl 4- <i>O</i> -(2- <i>O</i> -benzyl-3,4- <i>O</i> -carbonyl- $\beta$ -L-rhamnopyranosyl)-2,3- <i>O</i> -isopropylidene- $\alpha$ -L-rhamnopyranoside(10 $\beta$ )                                                                   | S-13, 14 |
| Methyl 3- <i>O</i> -benzyl-4,6- <i>O</i> -benzylidene-2- <i>O</i> -(2- <i>O</i> -benzyl-3,4- <i>O</i> -carbonyl- $\alpha$ -L-rhamnopyranosyl)- $\alpha$ -D-mannopyranoside (12 $\alpha$ )                                                | S-15, 16 |
| Methyl 3- <i>O</i> -benzyl-4,6- <i>O</i> -benzylidene-2- <i>O</i> -(2- <i>O</i> -benzyl-3,4- <i>O</i> -carbonyl- $\beta$ -L-rhamnopyranosyl)- $\alpha$ -D-mannopyranoside (12 $\beta$ )                                                  | S-17, 18 |
| Methyl 6- <i>O</i> -[(4- <i>O</i> -benzoyl-3- <i>O</i> -benzyl-2- <i>O</i> -(2-trifluoromethylbenzenesulfonyl)- $\alpha$ -L-rhamnopyranosyl)]-2,3,4-tri- <i>O</i> -benzyl- $\alpha$ -D-glucopyranoside (13 $\alpha$ )                    | S-19, 20 |
| Methyl 6- <i>O</i> -[(4- <i>O</i> -benzoyl-3- <i>O</i> -benzyl-2- <i>O</i> -(2-trifluoromethylbenzenesulfonyl)- $\beta$ -L-rhamnopyranosyl)]-2,3,4-tri- <i>O</i> -benzyl- $\alpha$ -D-glucopyranoside (13 $\beta$ )                      | S-21, 22 |
| Methyl 4- <i>O</i> -[(4- <i>O</i> -benzoyl-3- <i>O</i> -benzyl-2- <i>O</i> -(2-trifluoromethylbenzenesulfonyl)- $\alpha$ -L-rhamnopyranosyl)]-2,3- <i>O</i> -isopropylidene- $\alpha$ -L-rhamnopyranoside (14 $\alpha$ )                 | S-23, 24 |
| Methyl 4- <i>O</i> -[(4- <i>O</i> -benzoyl-3- <i>O</i> -benzyl-2- <i>O</i> -(2-trifluoromethylbenzenesulfonyl)- $\beta$ -L-rhamnopyranosyl)]-2,3- <i>O</i> -isopropylidene- $\alpha$ -L-rhamnopyranoside (14 $\beta$ )                   | S-25, 26 |
| Methyl 3- <i>O</i> -benzyl-4,6- <i>O</i> -benzylidene-2- <i>O</i> -[(4- <i>O</i> -benzoyl-3- <i>O</i> -benzyl-2- <i>O</i> -(2-trifluoromethylbenzenesulfonyl)- $\alpha$ -L-rhamnopyranosyl)]- $\alpha$ -D-mannopyranoside (15 $\alpha$ ) | S-27, 28 |
| Methyl 3- <i>O</i> -benzyl-4,6- <i>O</i> -benzylidene-2- <i>O</i> -[(4- <i>O</i> -benzoyl-3- <i>O</i> -benzyl-2- <i>O</i> -(2-trifluoromethylbenzenesulfonyl)- $\beta$ -L-rhamnopyranosyl)]- $\alpha$ -D-mannopyranoside (15 $\beta$ )   | S-29, 30 |
| Methyl 3- <i>O</i> -[(4- <i>O</i> -benzoyl-3- <i>O</i> -benzyl-2- <i>O</i> -(2-trifluoromethylbenzenesulfonyl)- $\alpha$ -L-rhamnopyranosyl)]-2,4,6-tri- <i>O</i> -benzyl- $\alpha$ -D-mannopyranoside (17 $\alpha$ )                    | S-31, 32 |
| Methyl 3- <i>O</i> -[(4- <i>O</i> -benzoyl-3- <i>O</i> -benzyl-2- <i>O</i> -(2-trifluoromethylbenzenesulfonyl)- $\beta$ -L-rhamnopyranosyl)]-2,4,6-tri- <i>O</i> -benzyl- $\alpha$ -D-mannopyranoside (17 $\beta$ )                      | S-33, 34 |

|                                                                                           |          |
|-------------------------------------------------------------------------------------------|----------|
| Methyl 6- <i>O</i> -Acetyl-2,3,4-tri- <i>O</i> -benzyl- $\alpha$ -D-glucoopyranoside (19) | S-35, 36 |
| Compound-18                                                                               | S-37     |



(6 $\alpha$ )

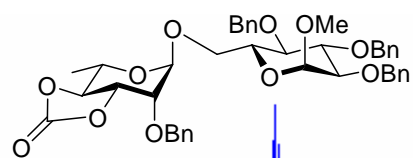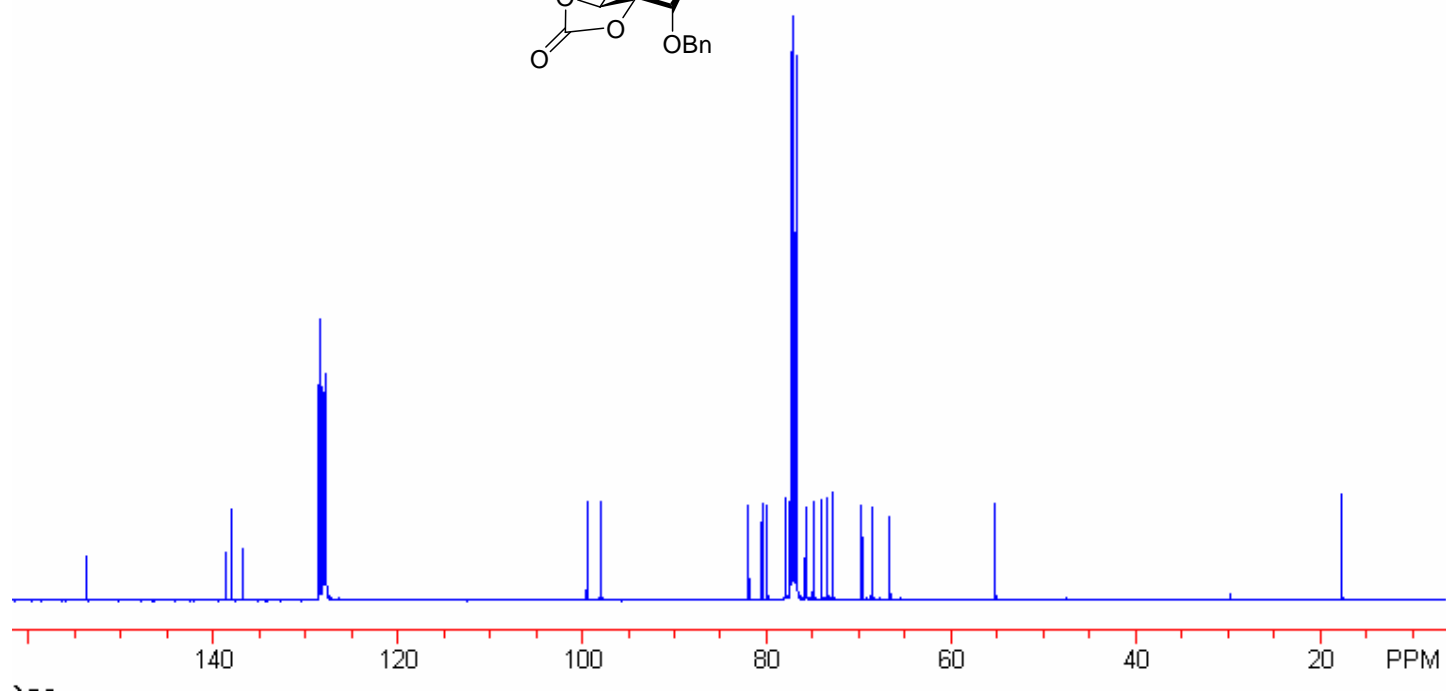

(6 $\beta$ )

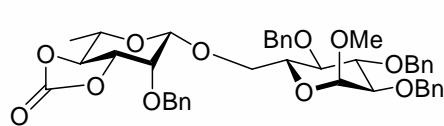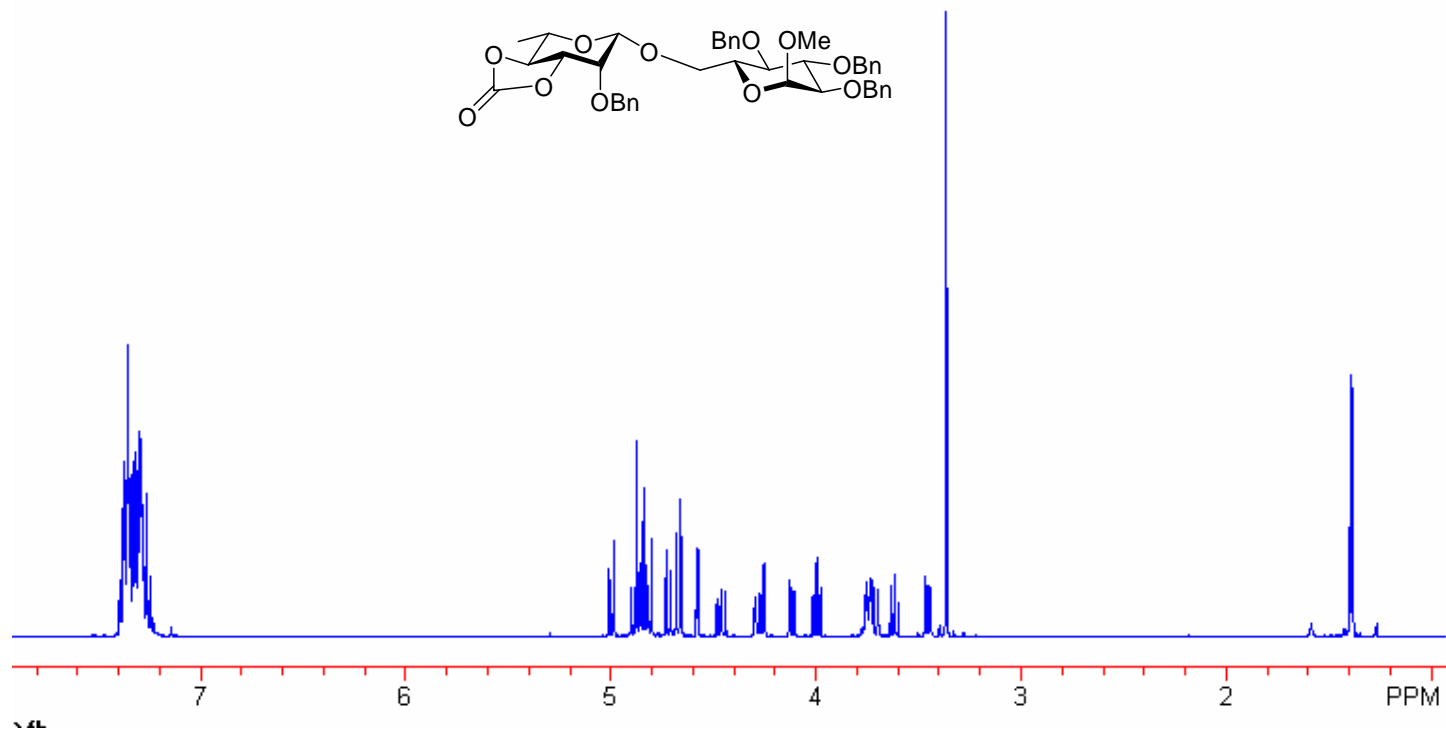

(6 $\beta$ )

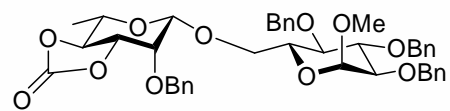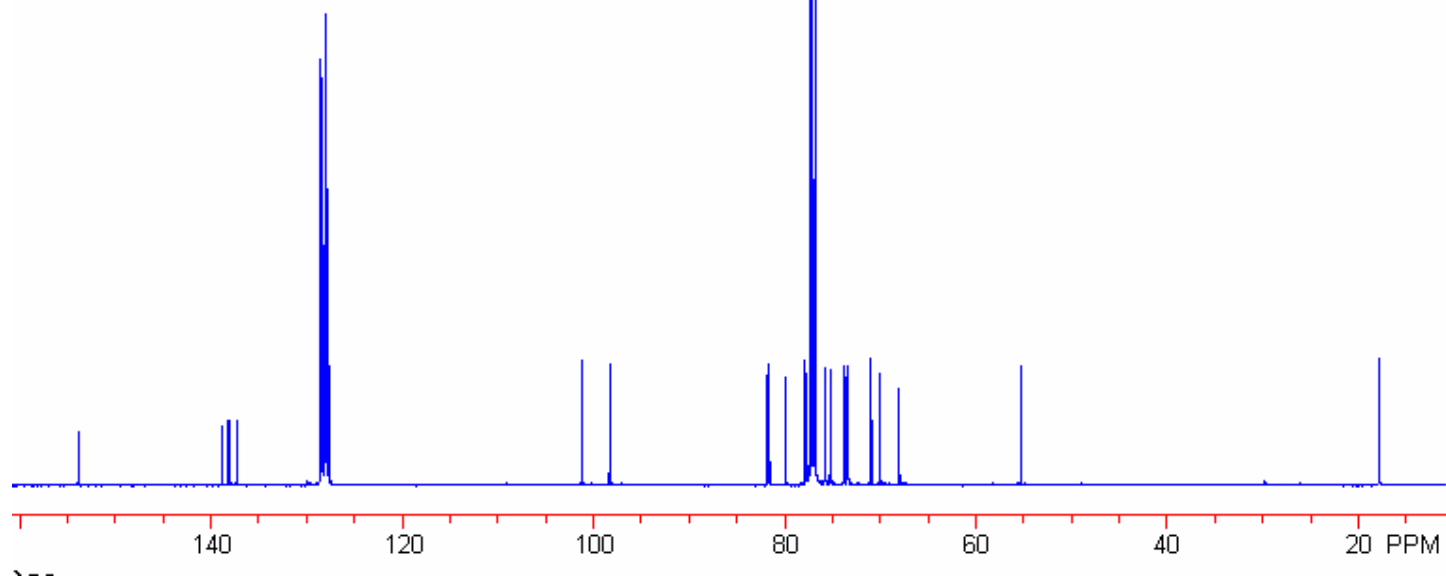

(8 $\alpha$ )

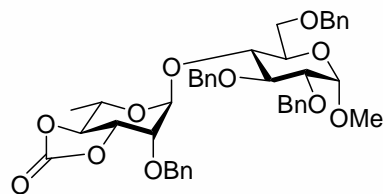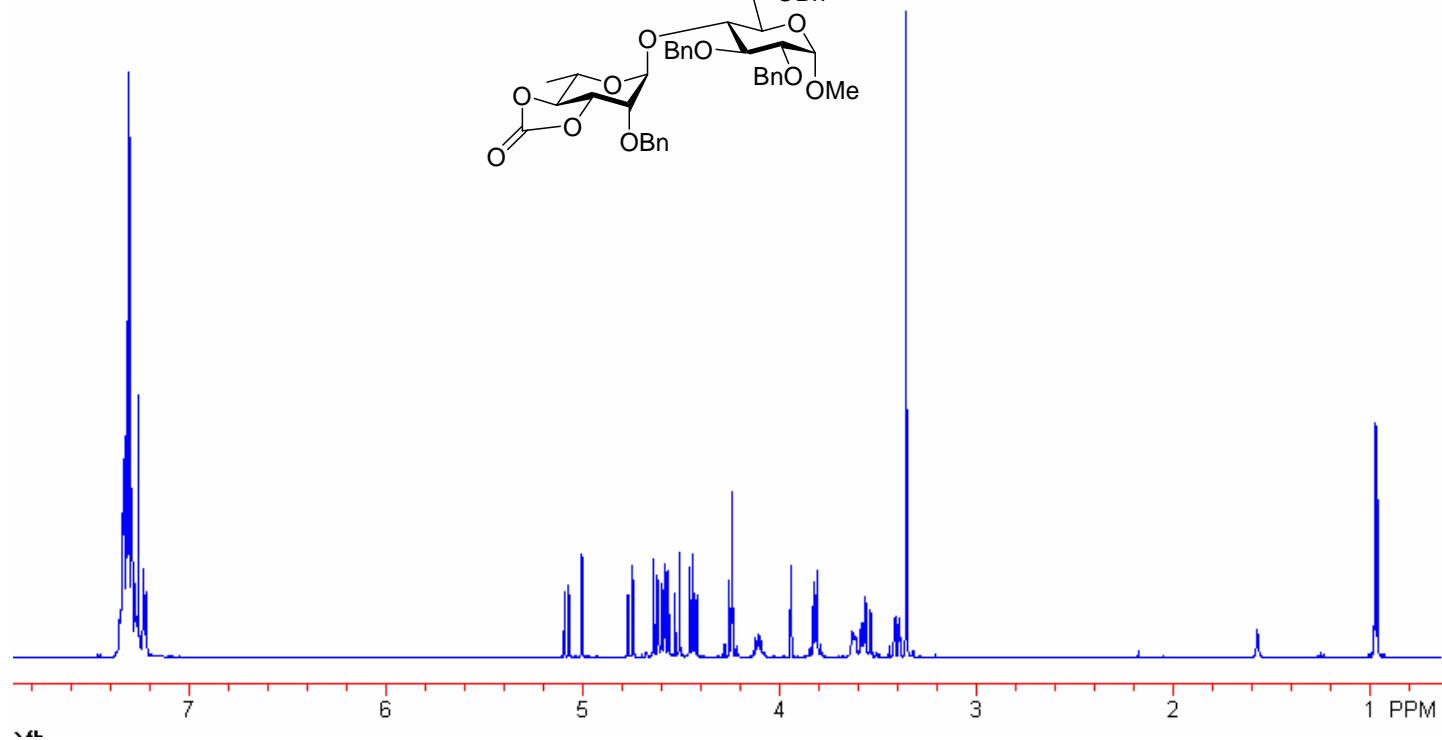

(8 $\alpha$ )

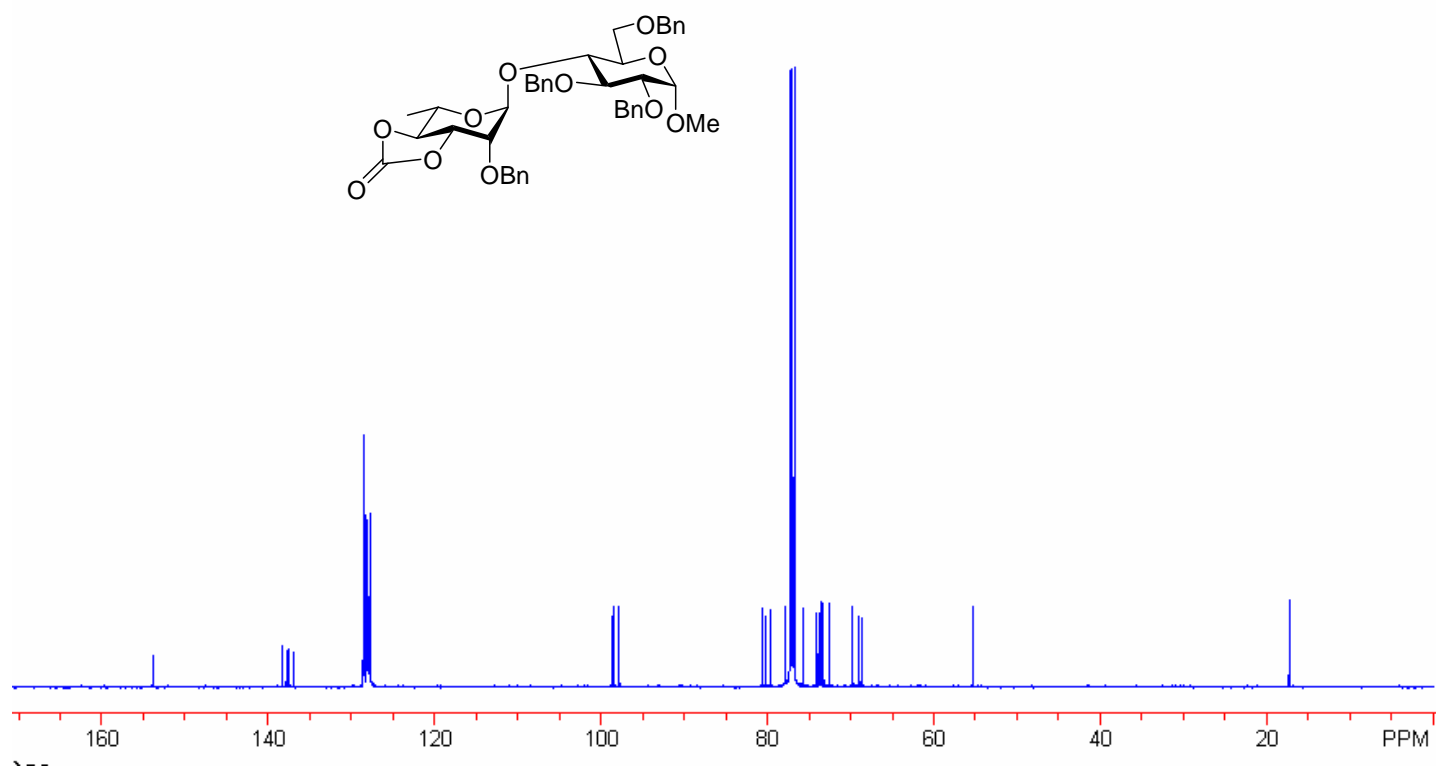



(8 $\beta$ )

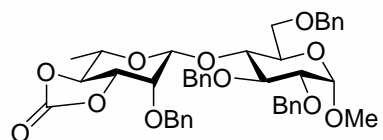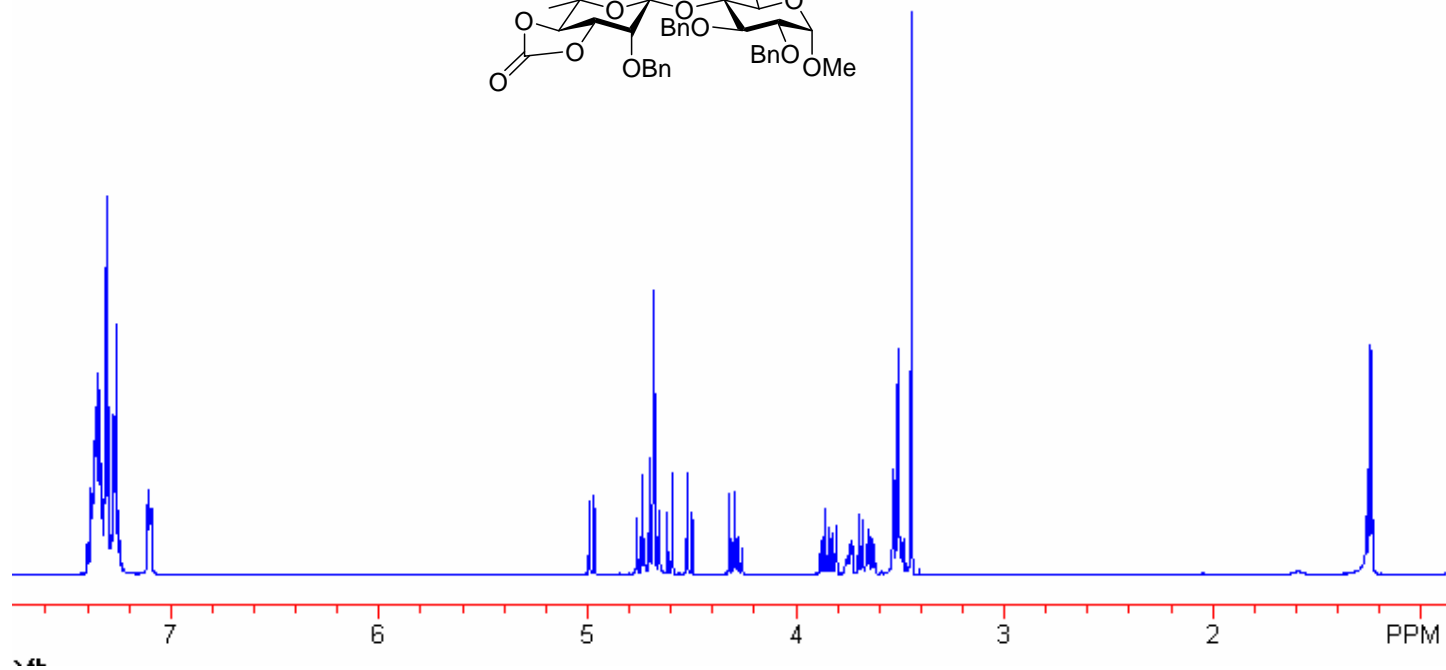

(8 $\beta$ )

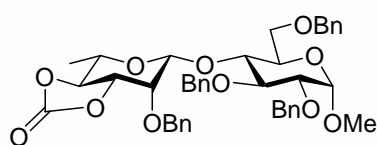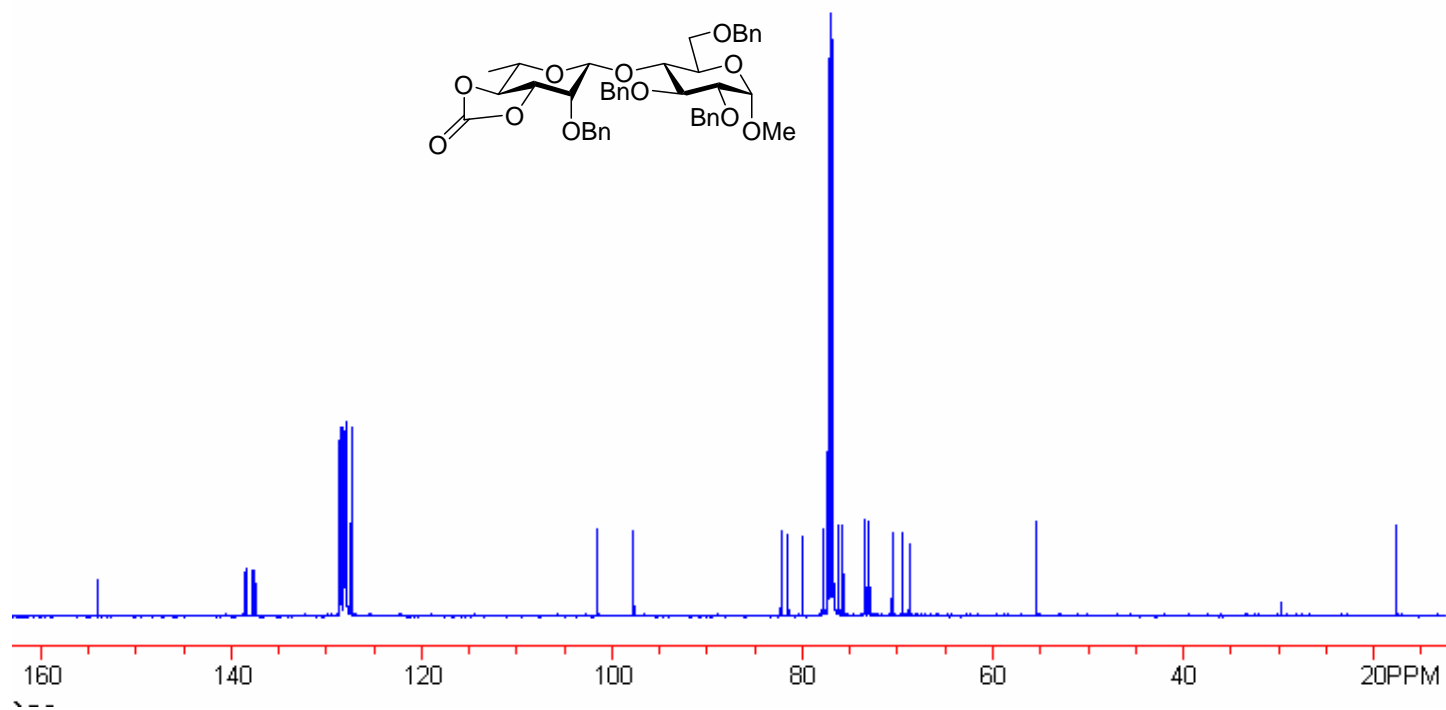

(10 $\alpha$ )

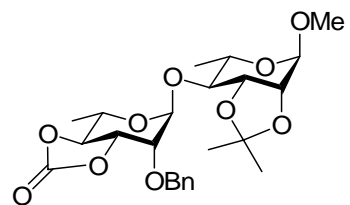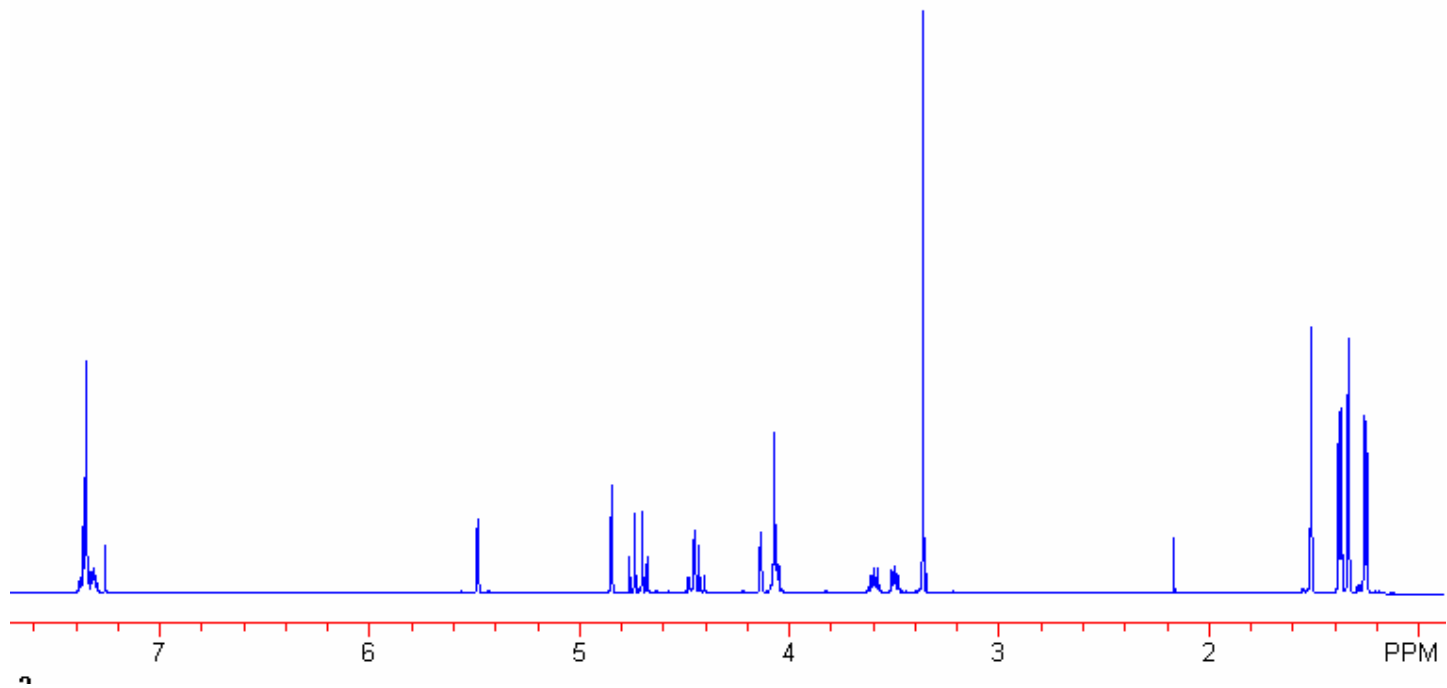

(10 $\alpha$ )

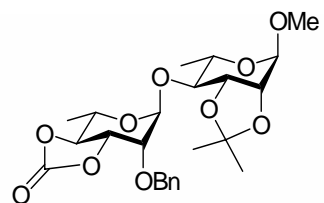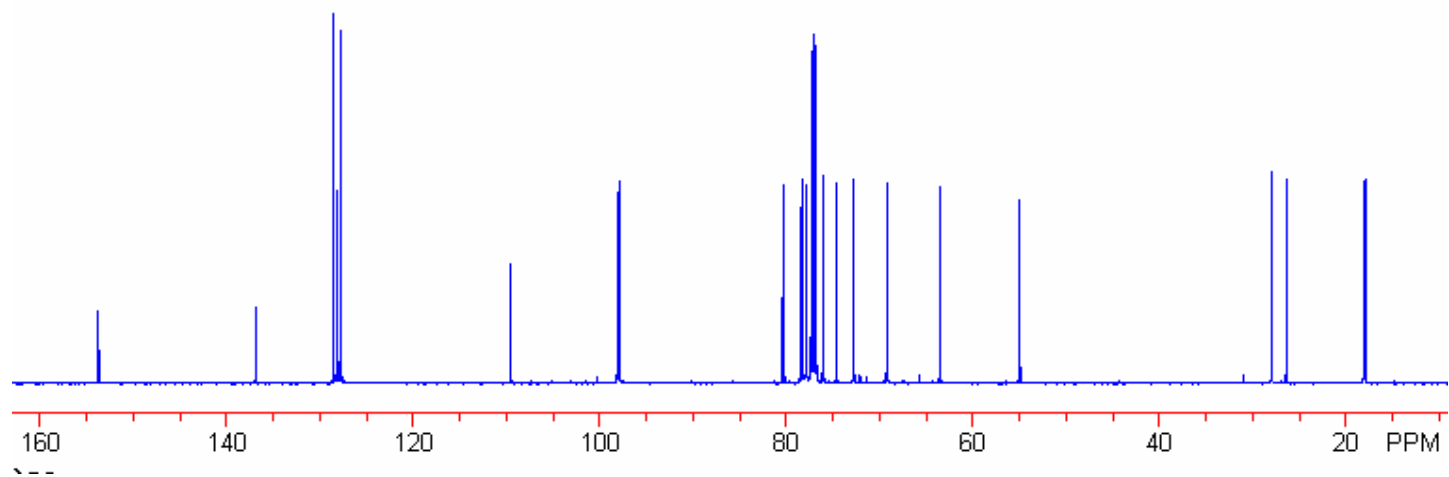

(10 $\beta$ )

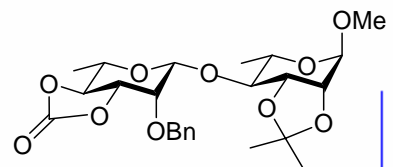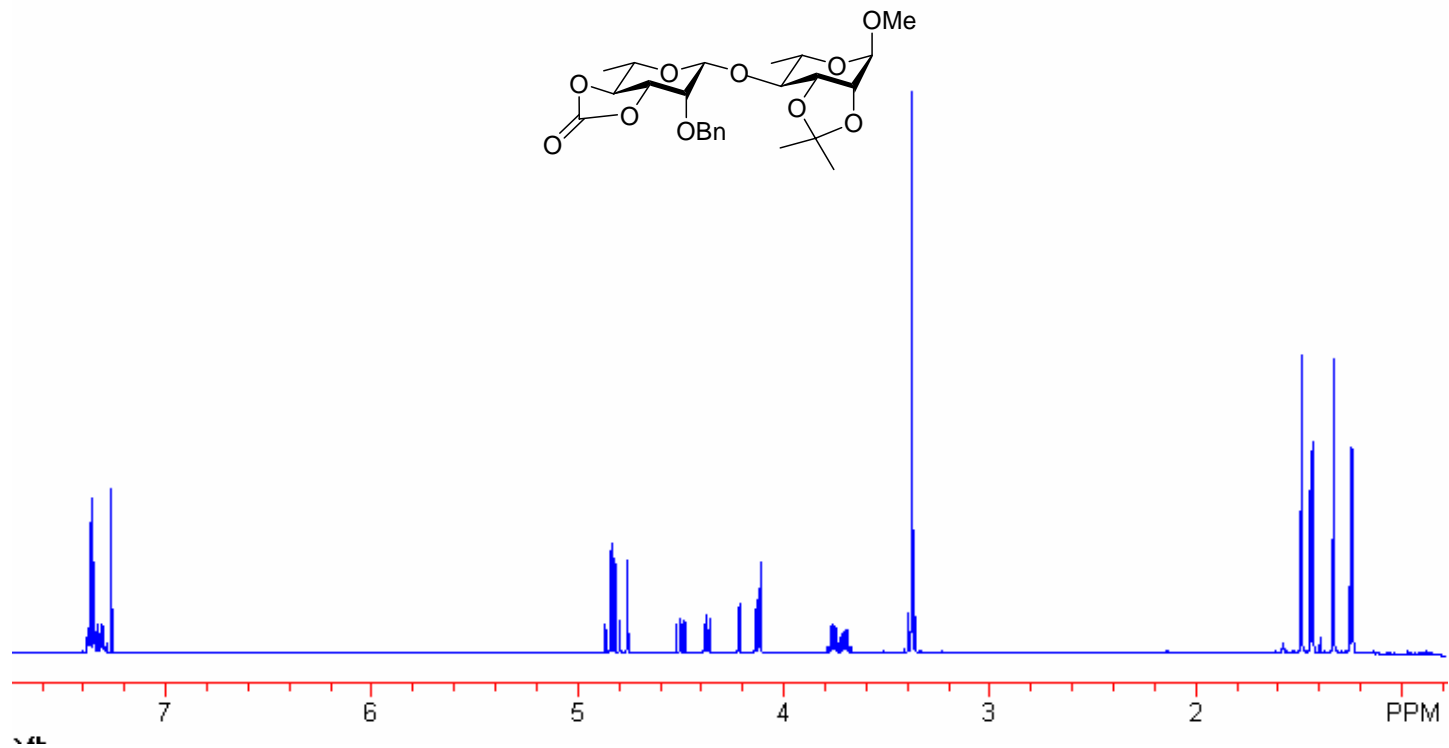

(10 $\beta$ )

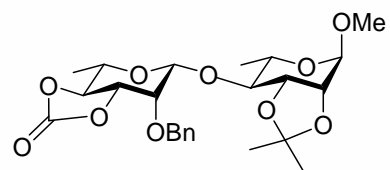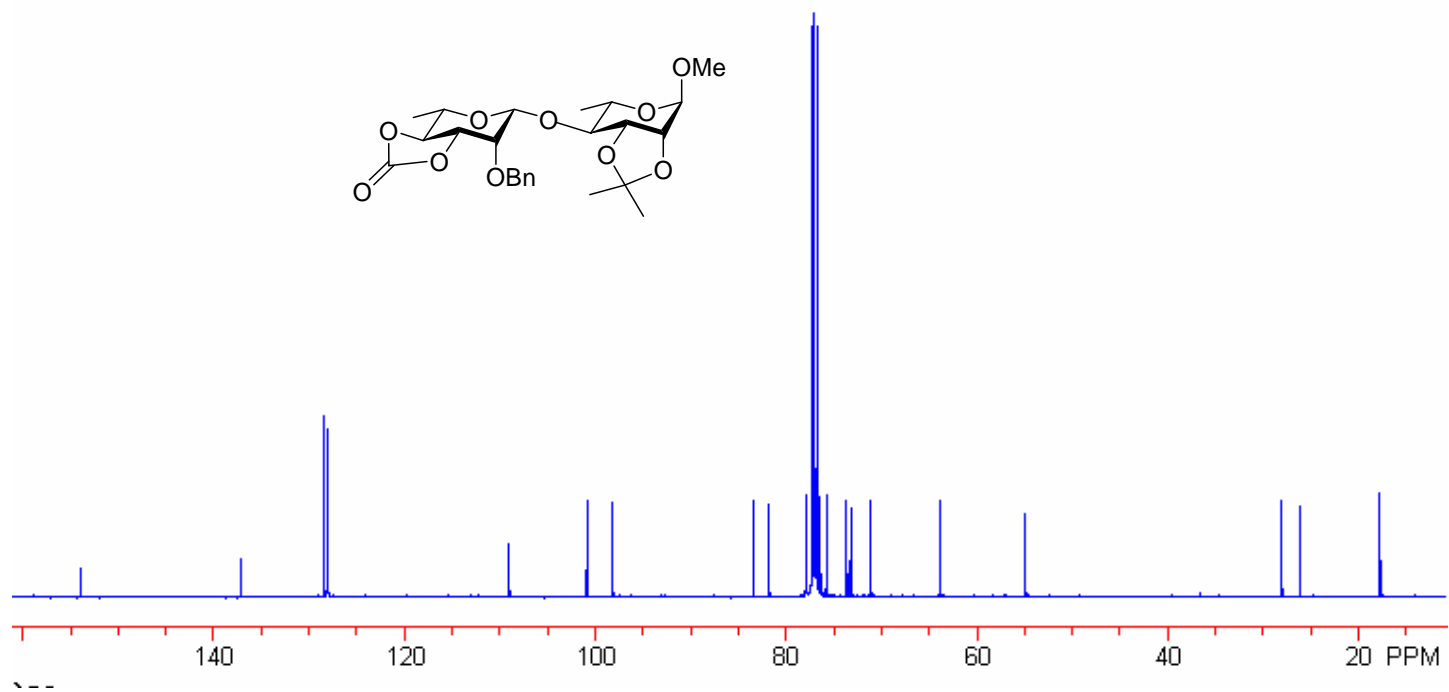

(12 $\alpha$ )

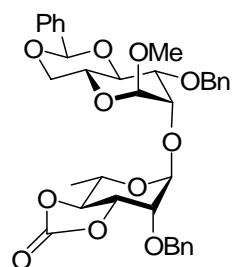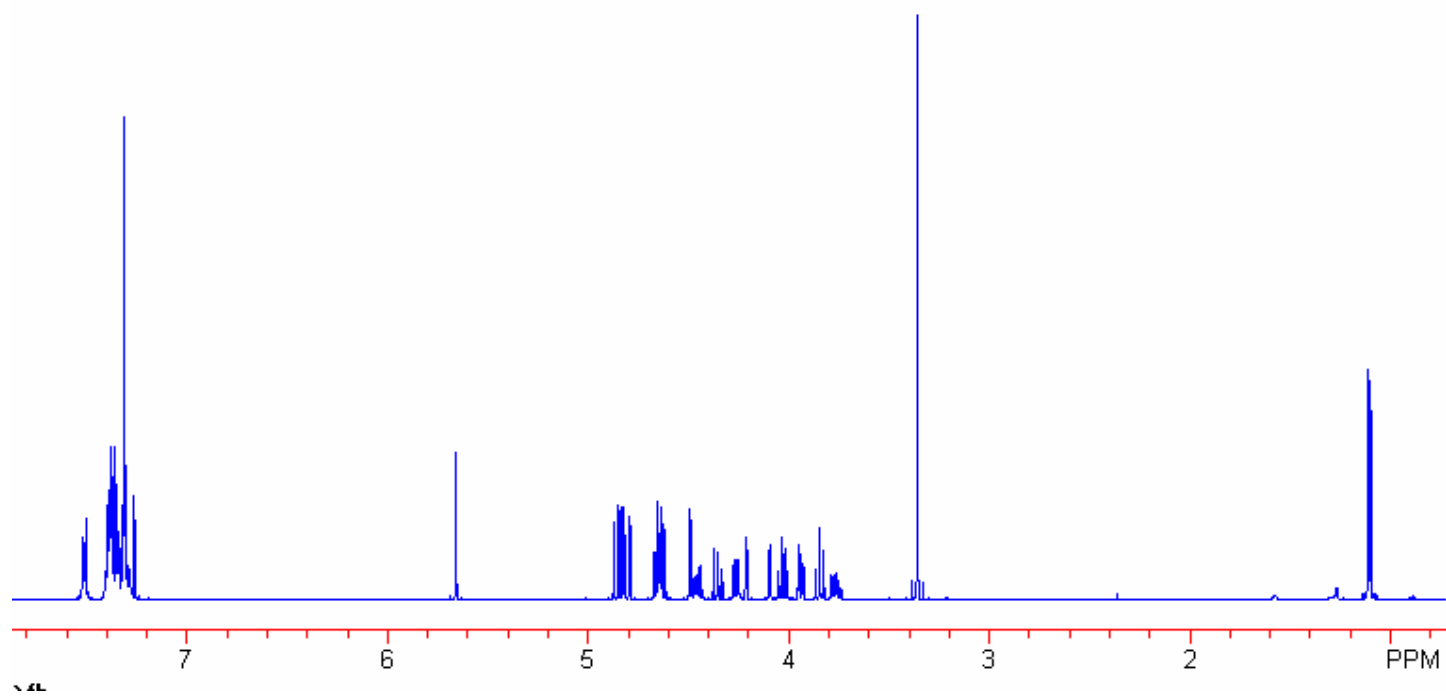

(12 $\alpha$ )

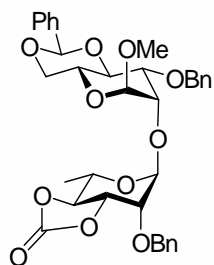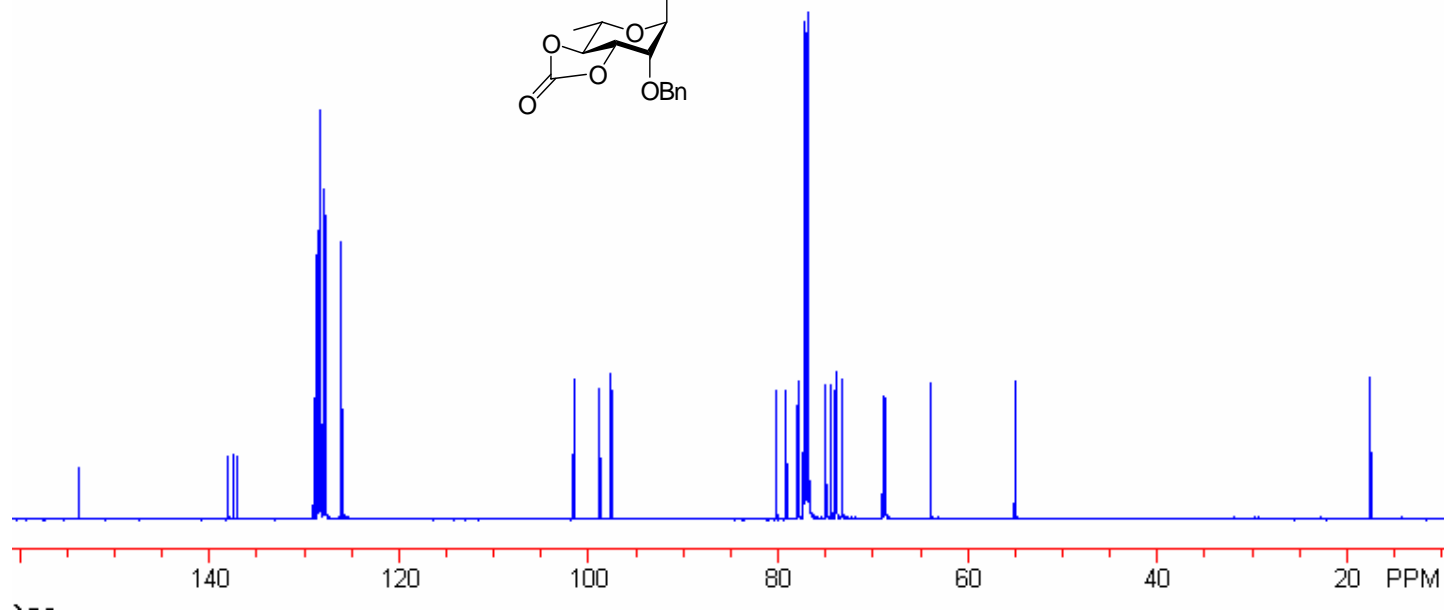







(13 $\alpha$ )

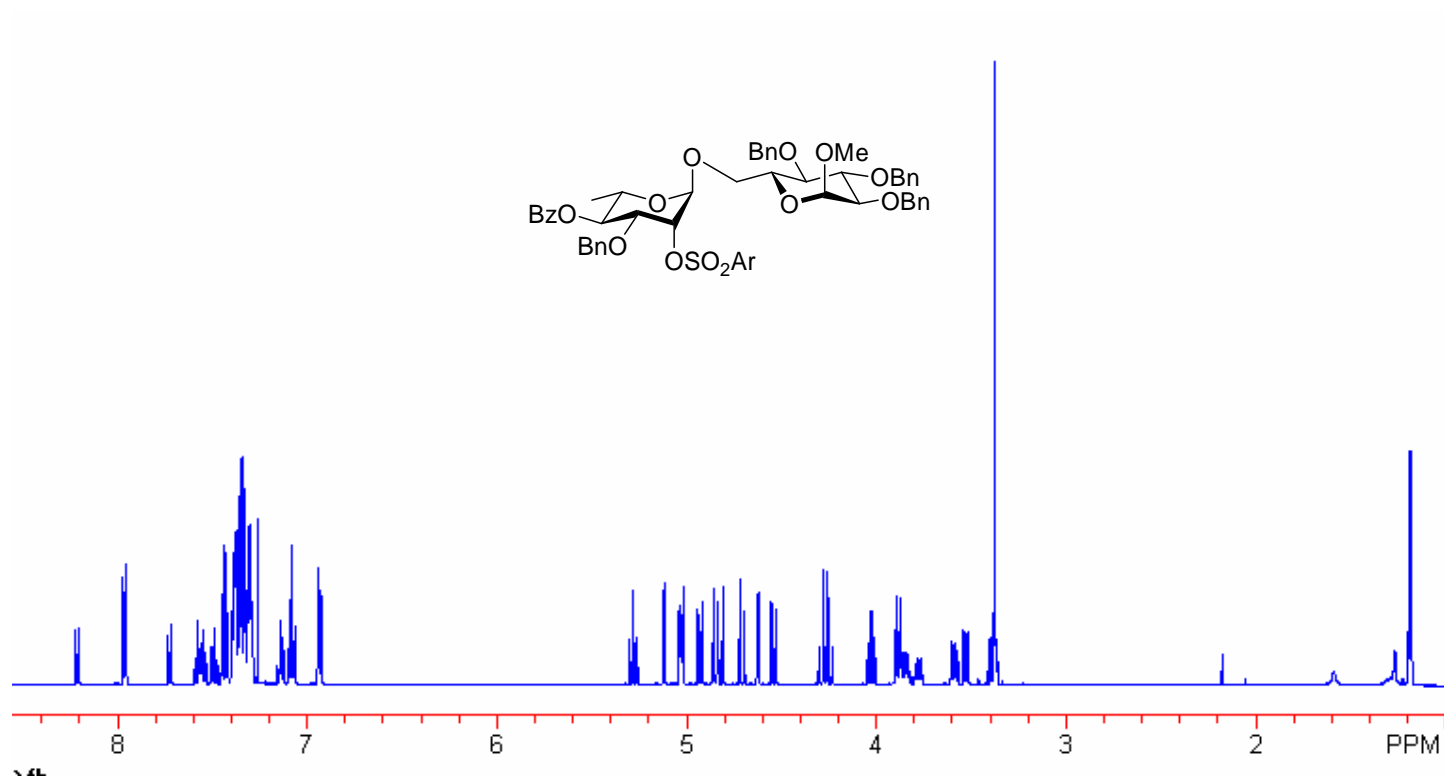

(13 $\alpha$ )

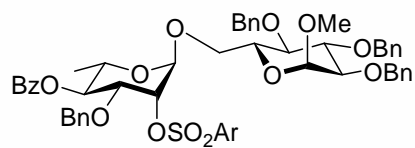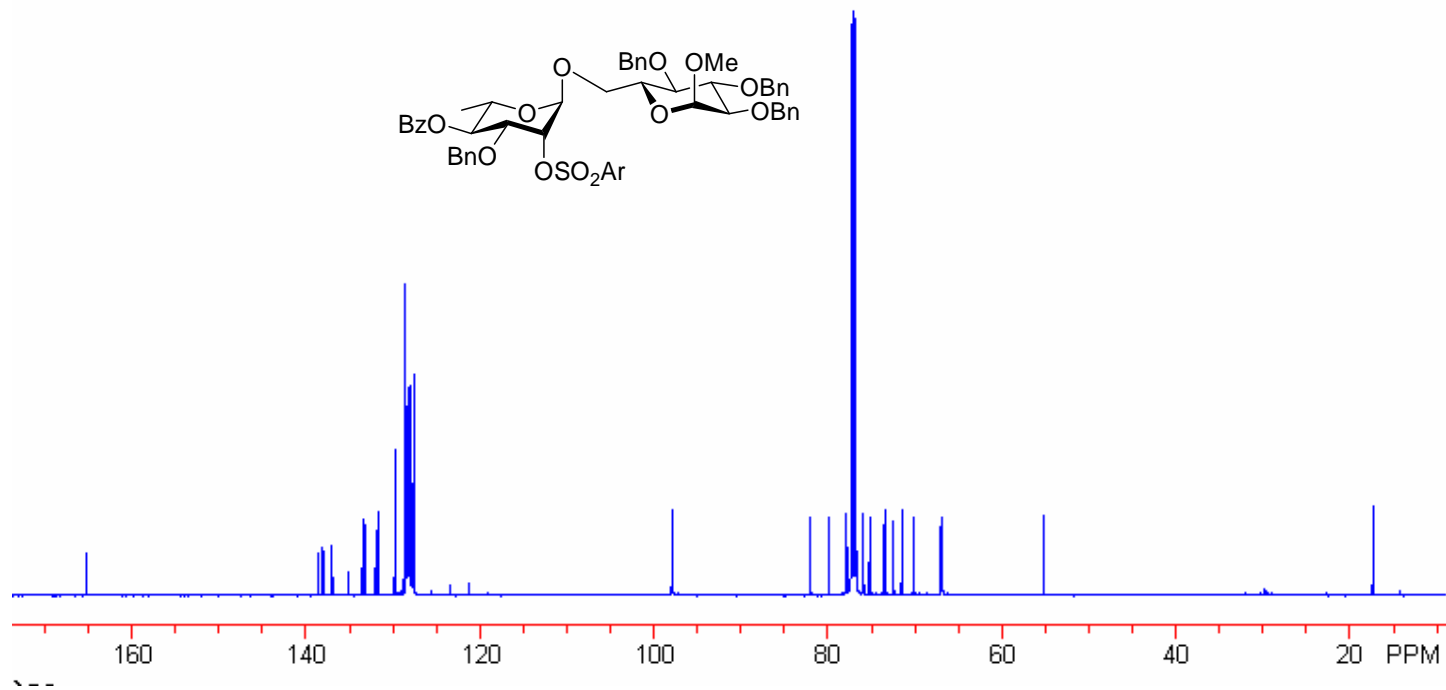

(13 $\beta$ )

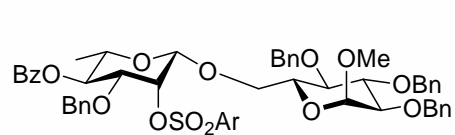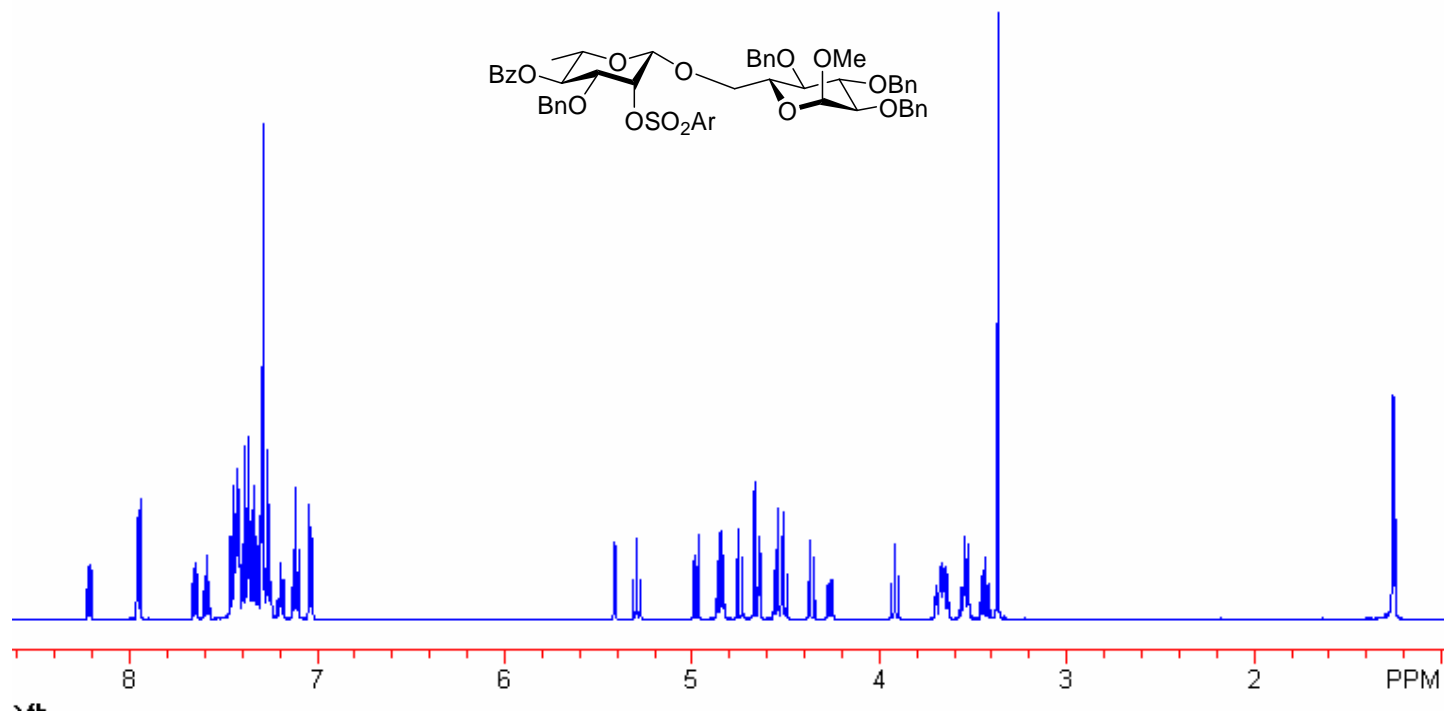

(13 $\beta$ )

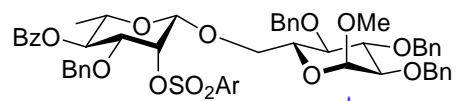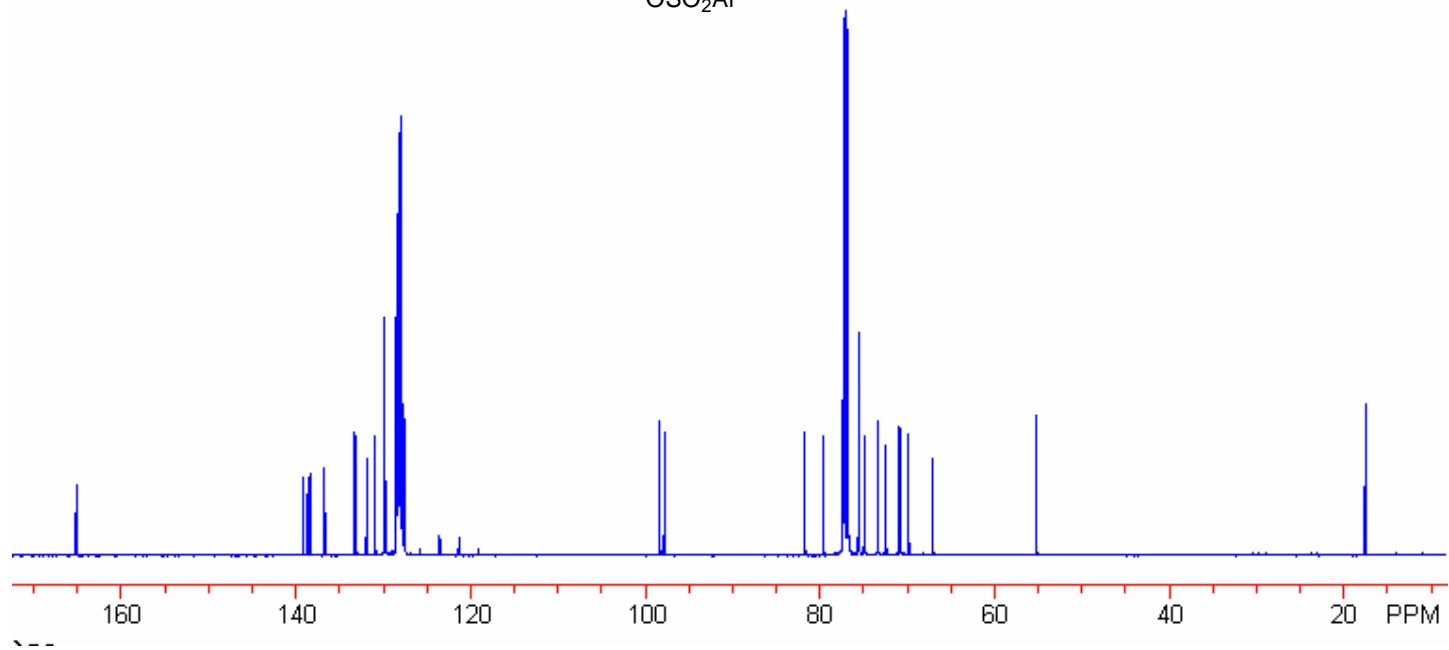

(14 $\alpha$ )

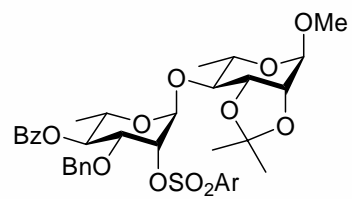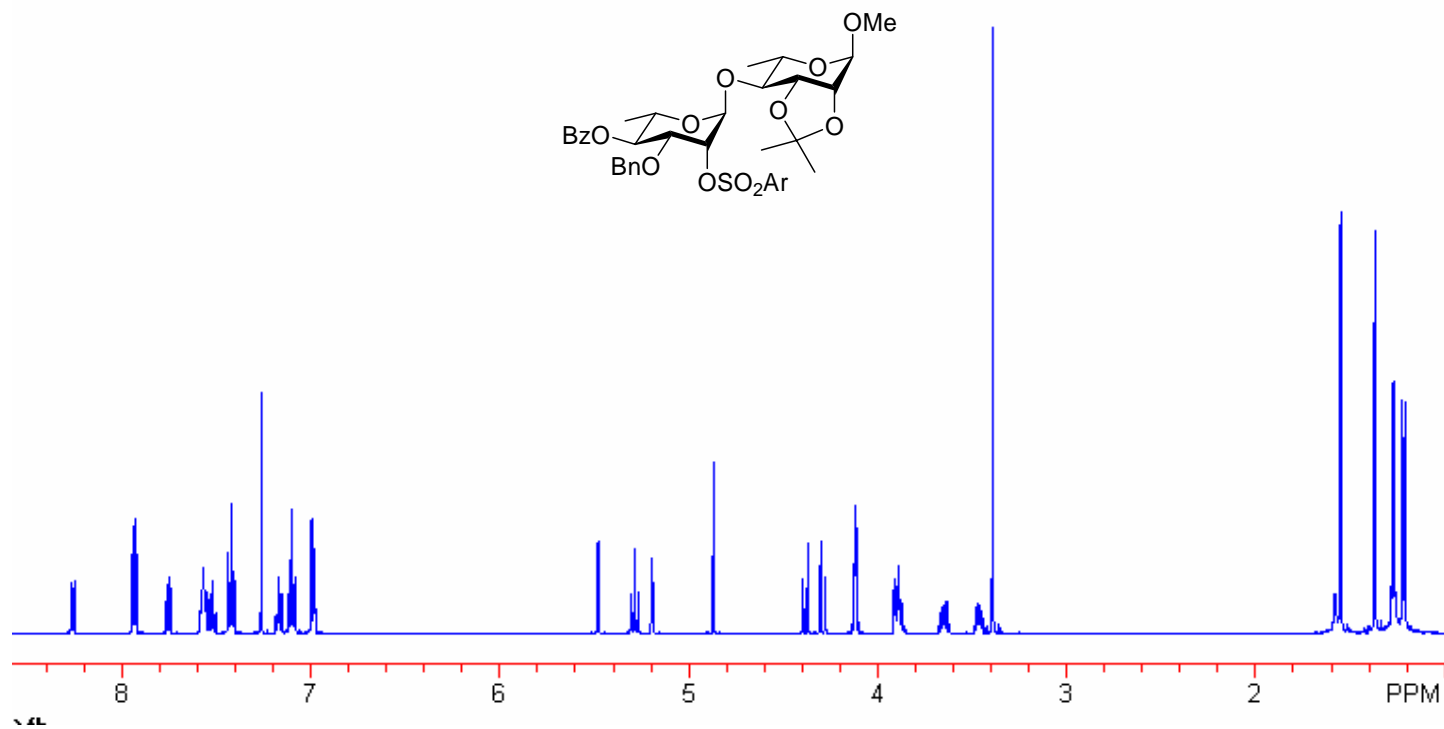

(14 $\alpha$ )

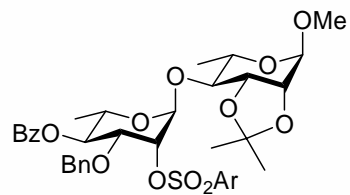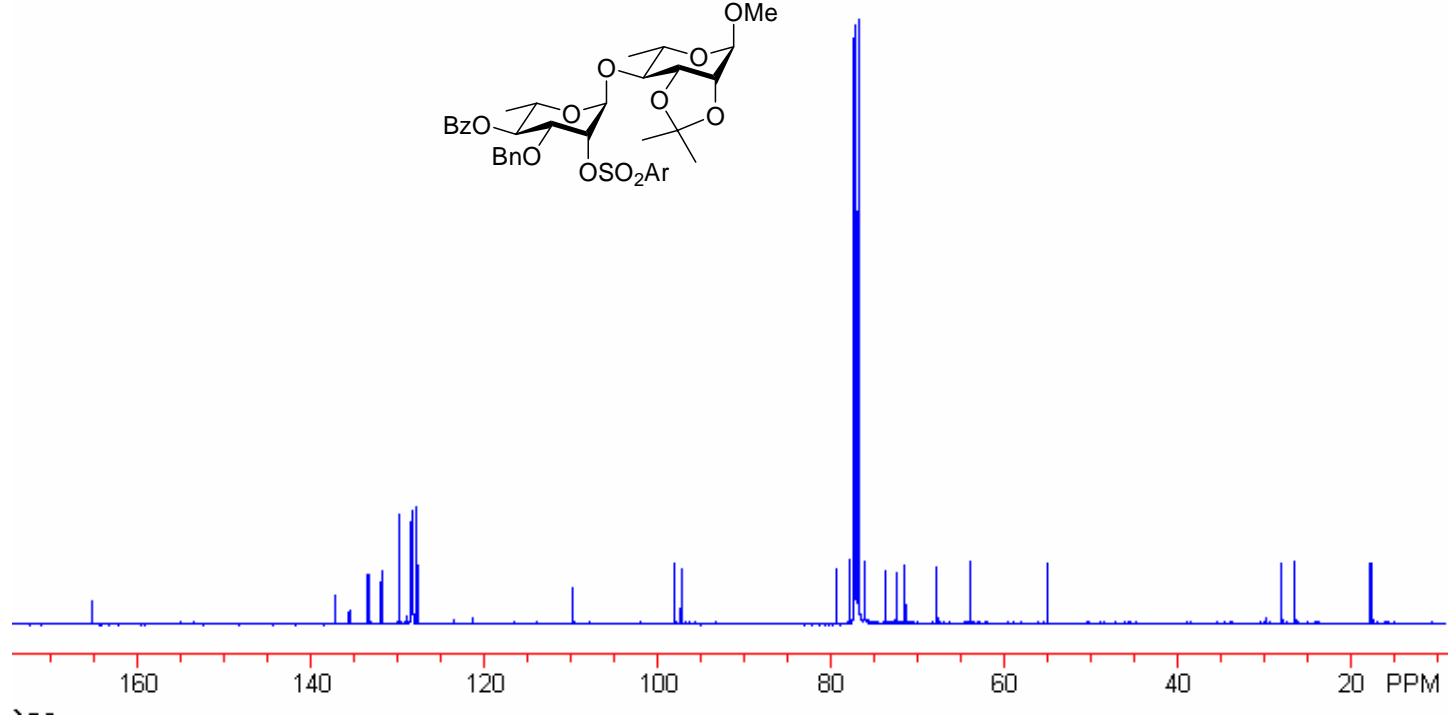



(14 $\beta$ )

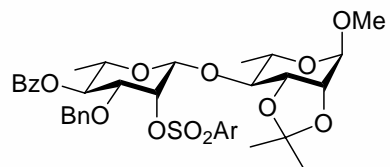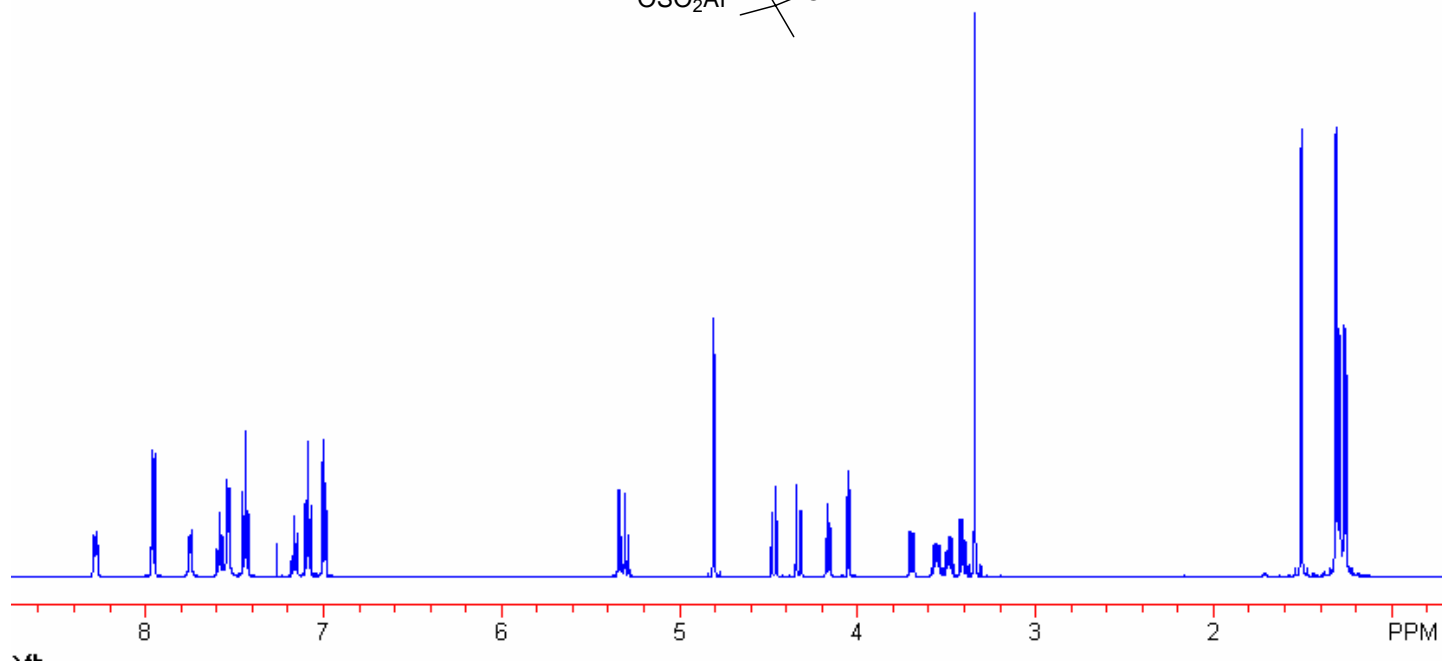

(14 $\beta$ )

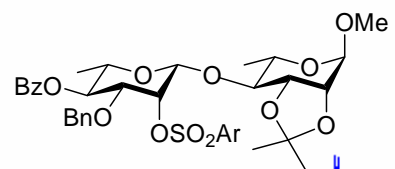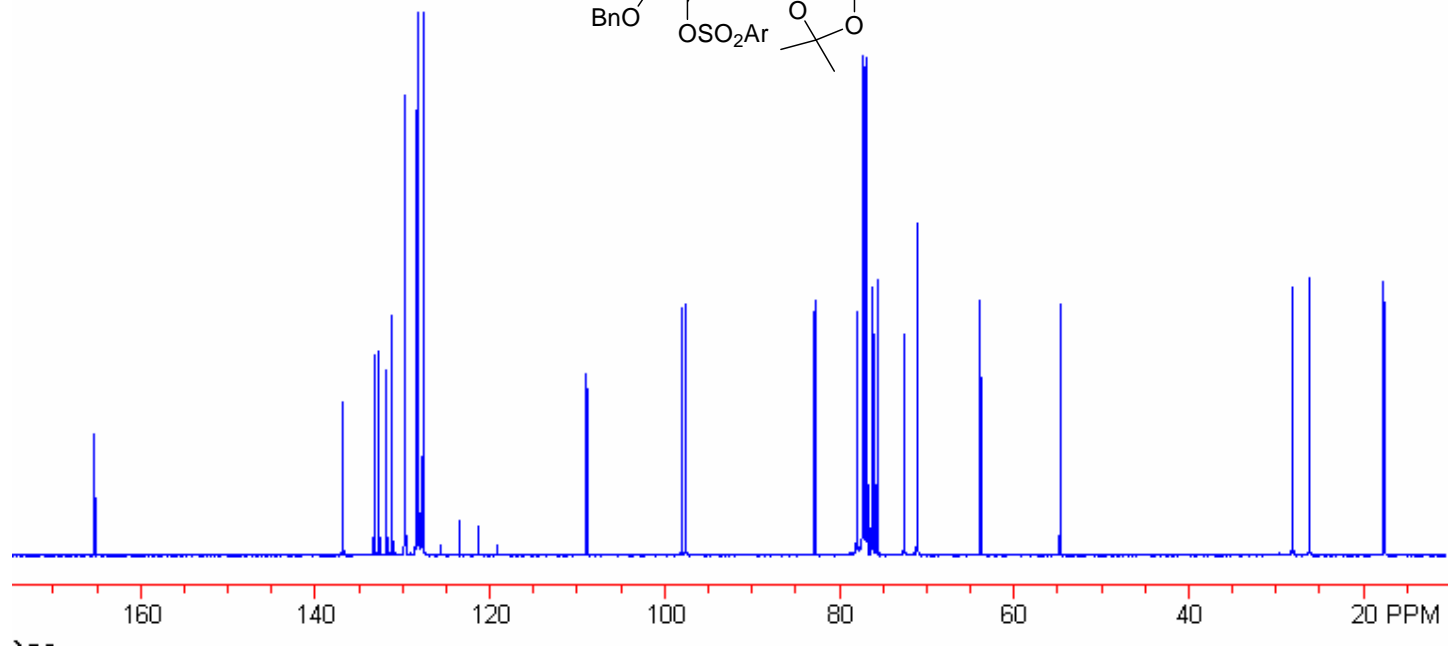

(15 $\alpha$ )

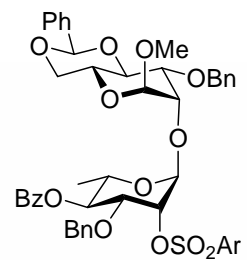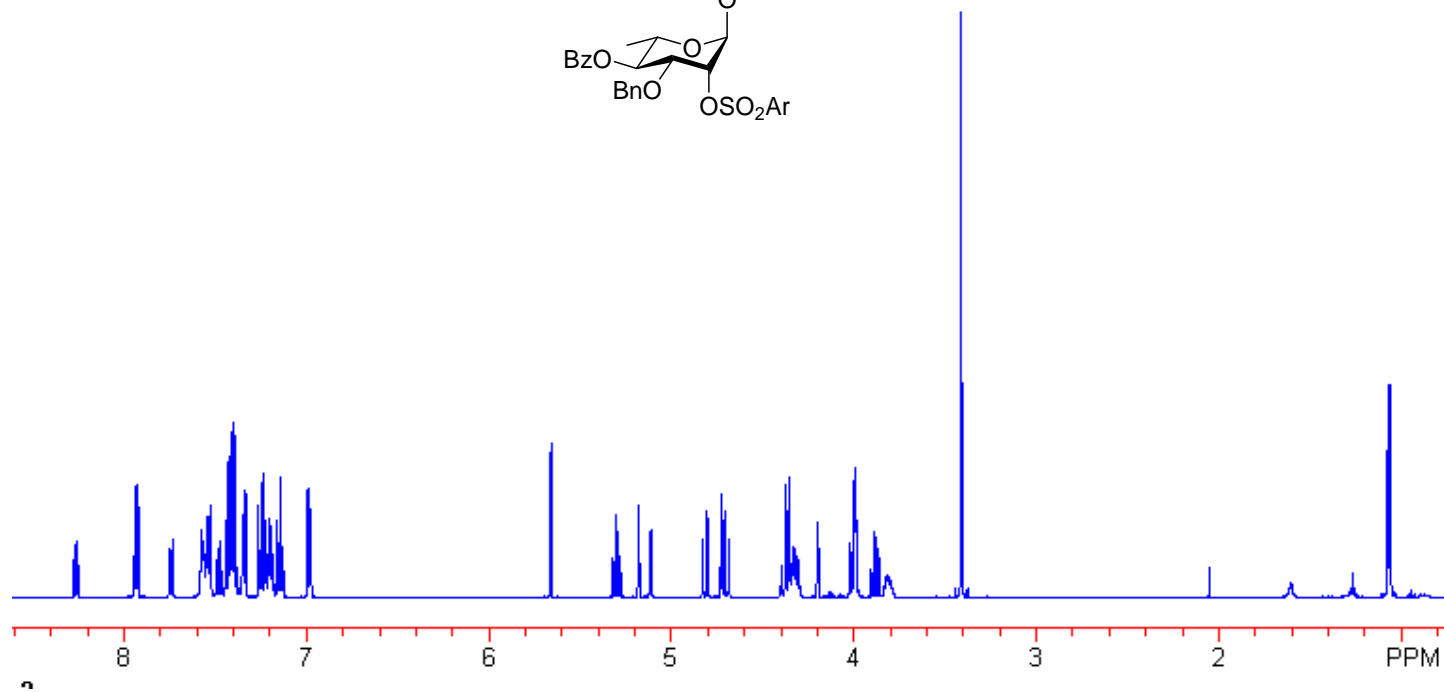

(15 $\alpha$ )

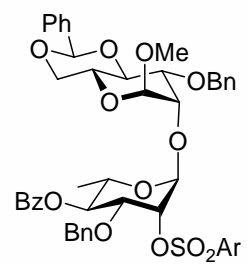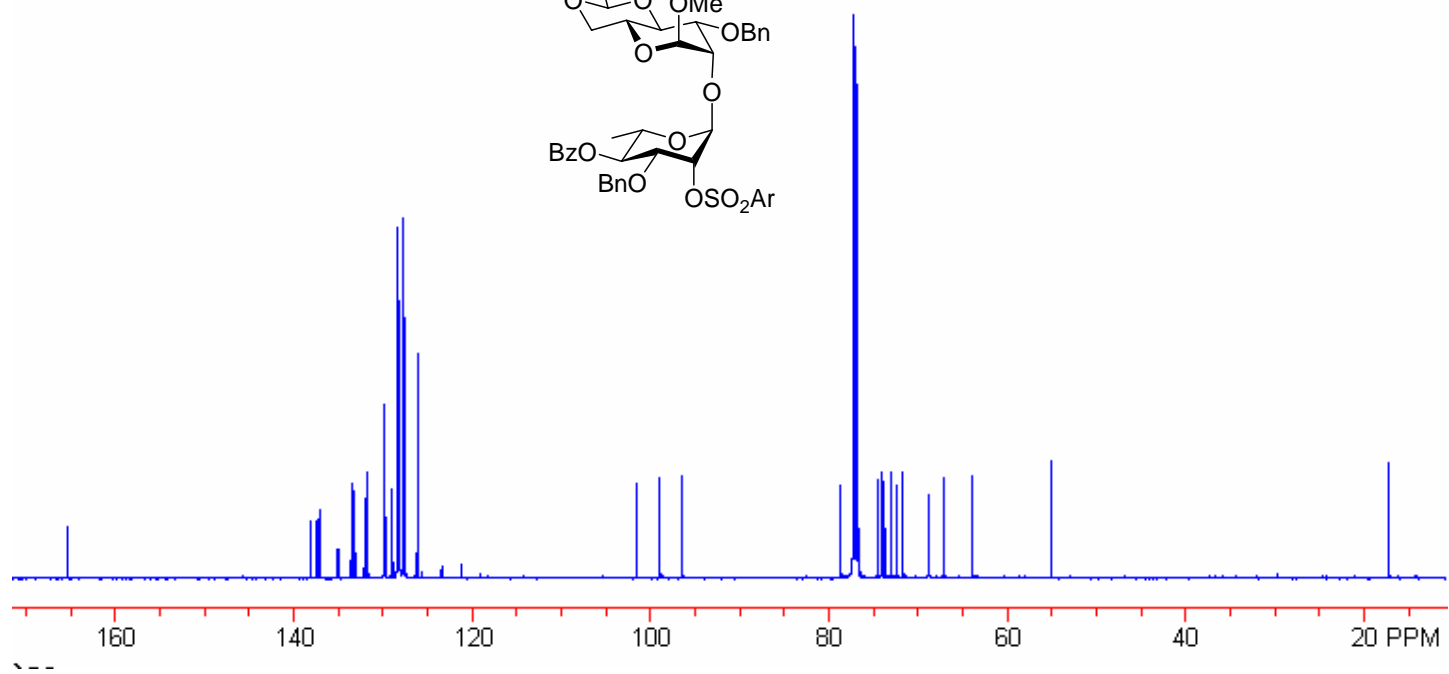

(15 $\beta$ )

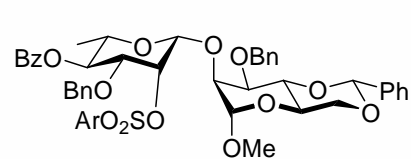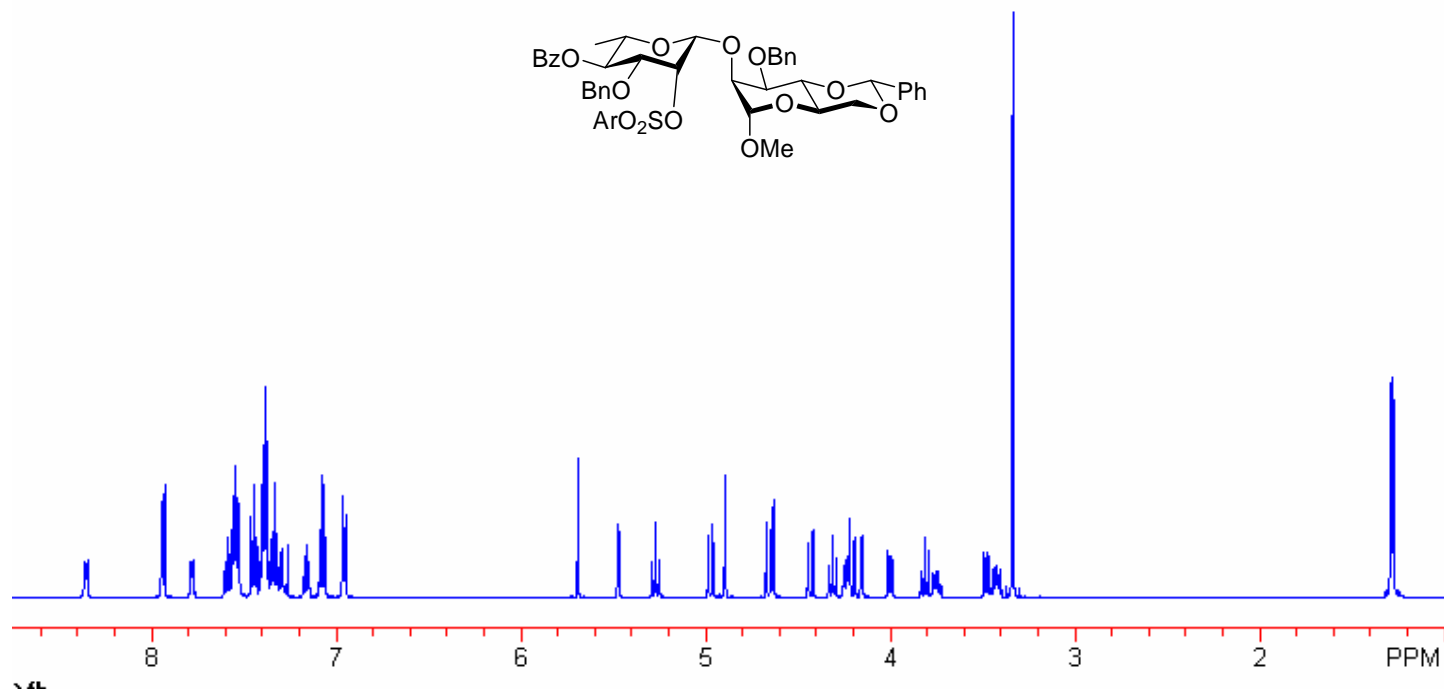

(15 $\beta$ )

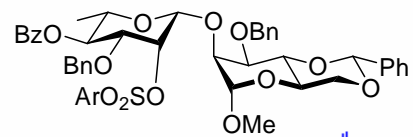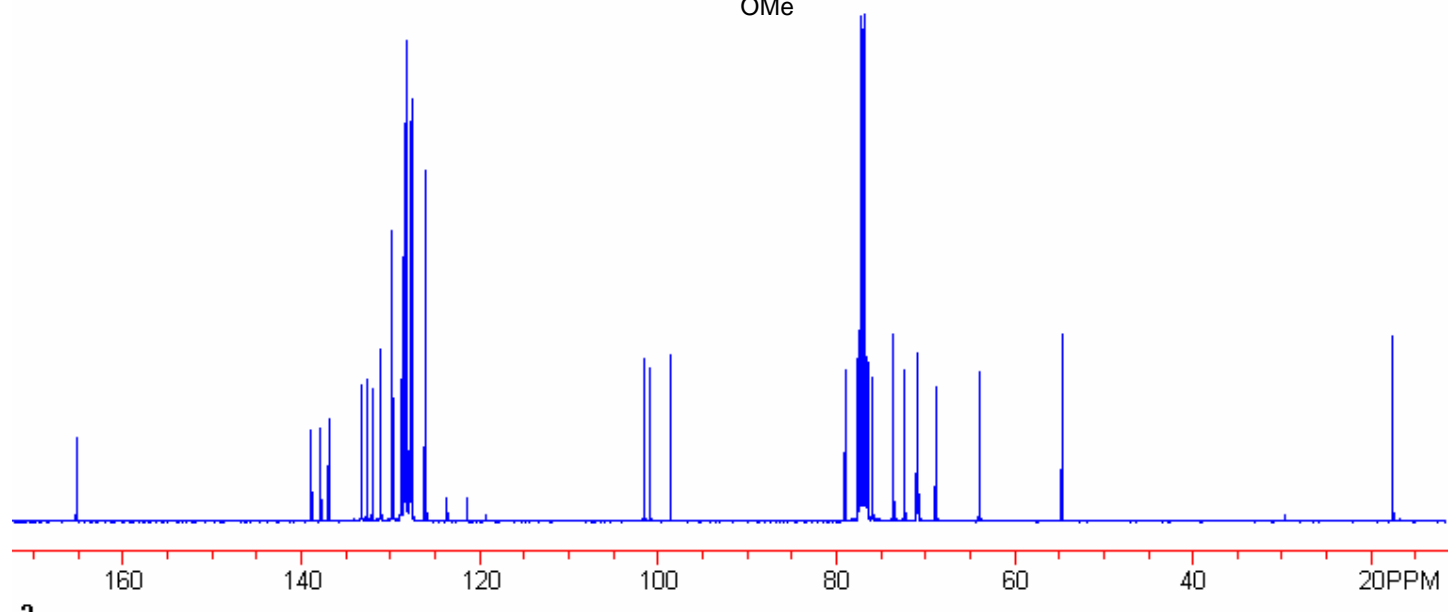

(17 $\alpha$ )

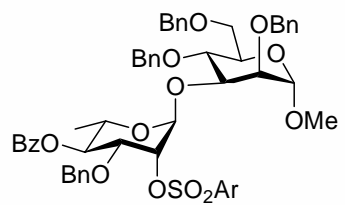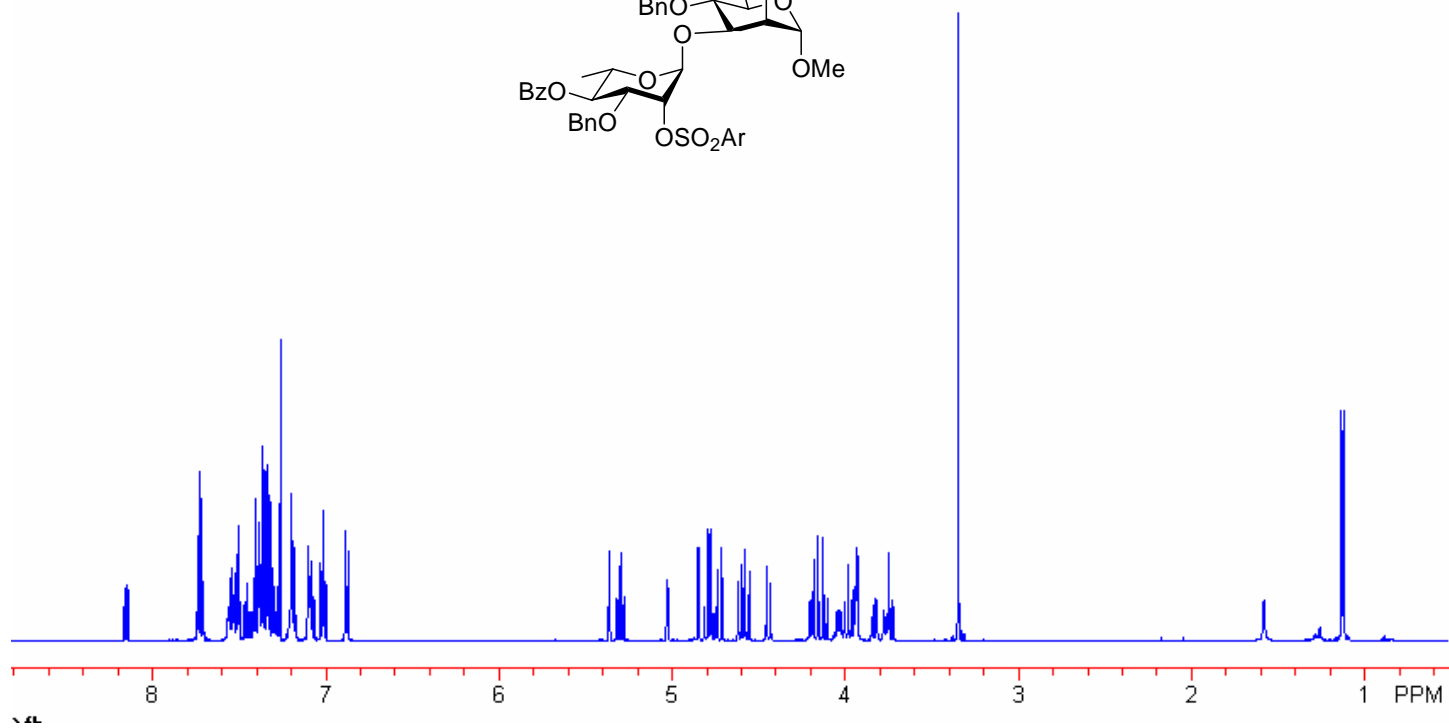

(17 $\alpha$ )

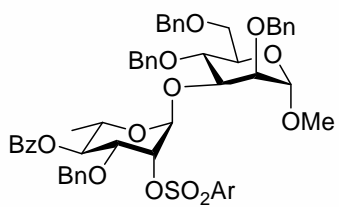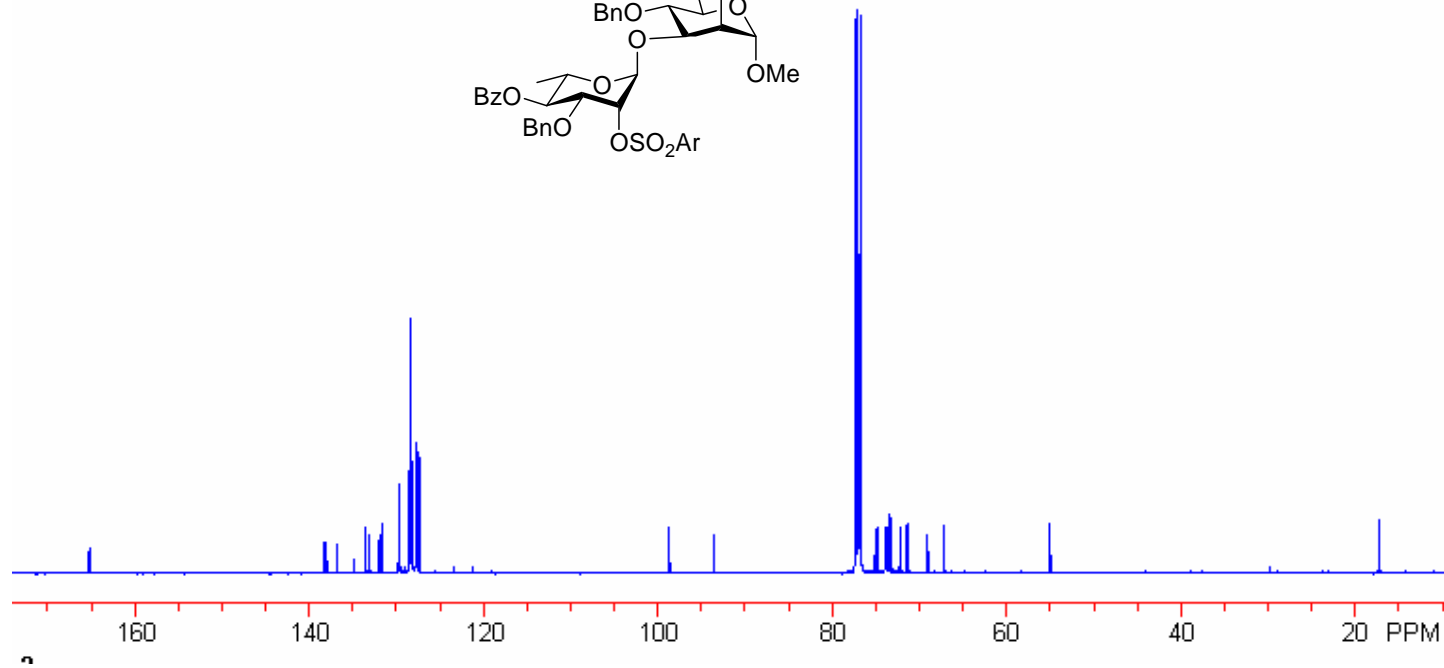



(17 $\beta$ )

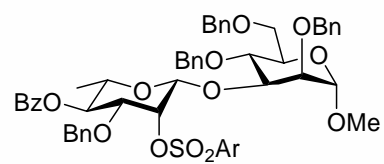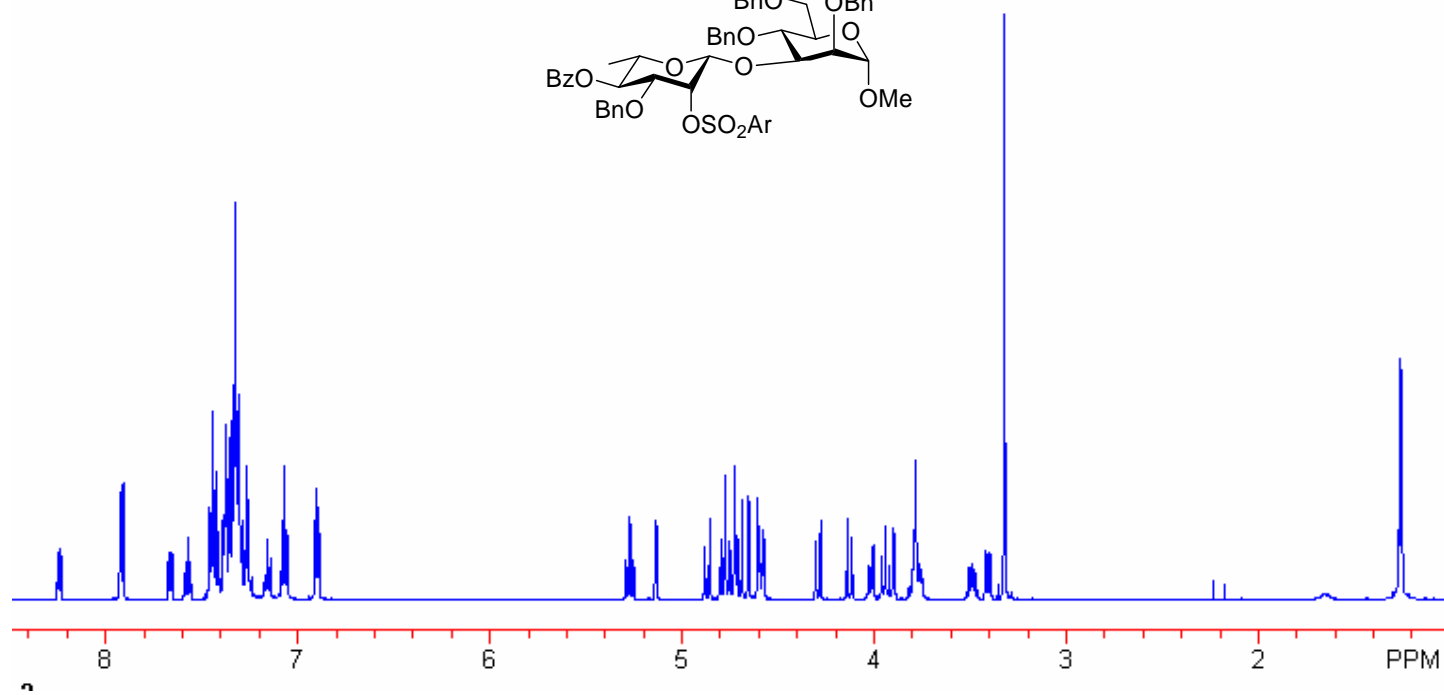

(17 $\beta$ )

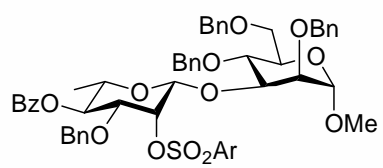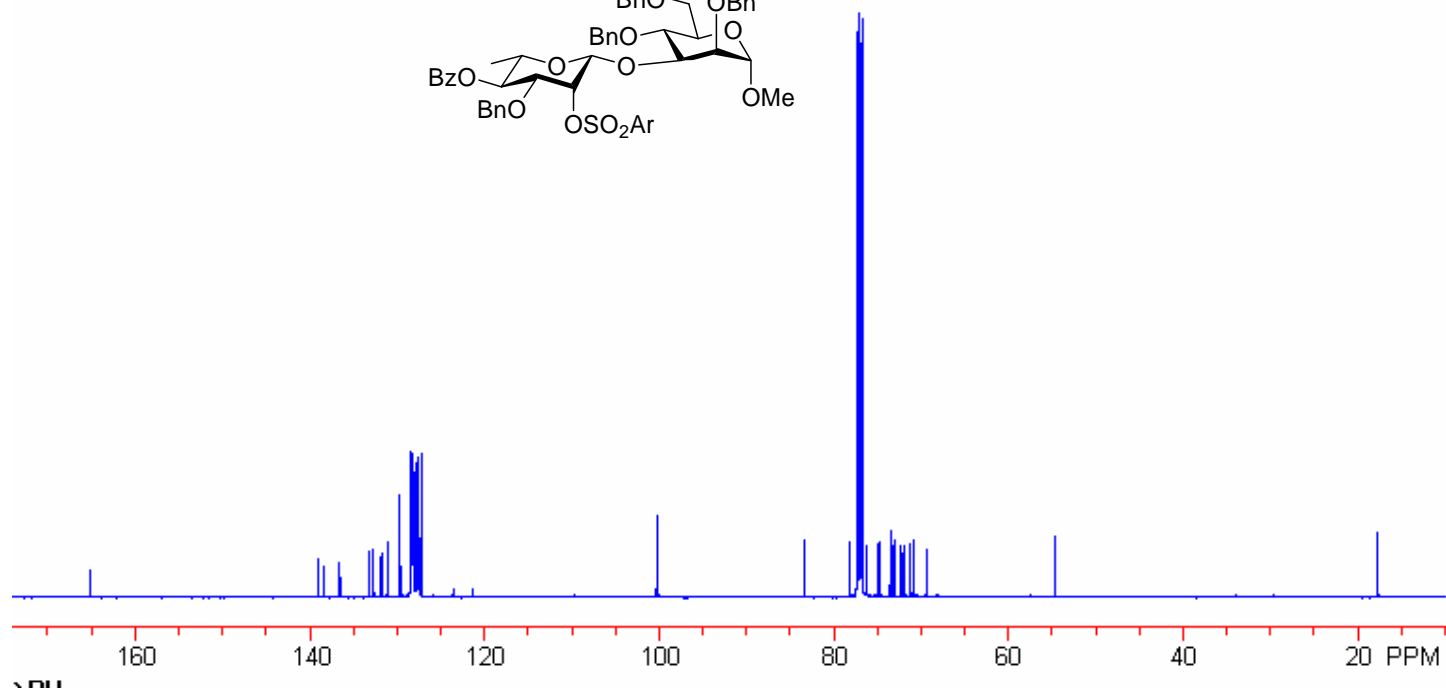

(19)

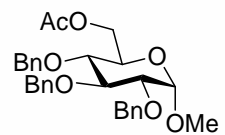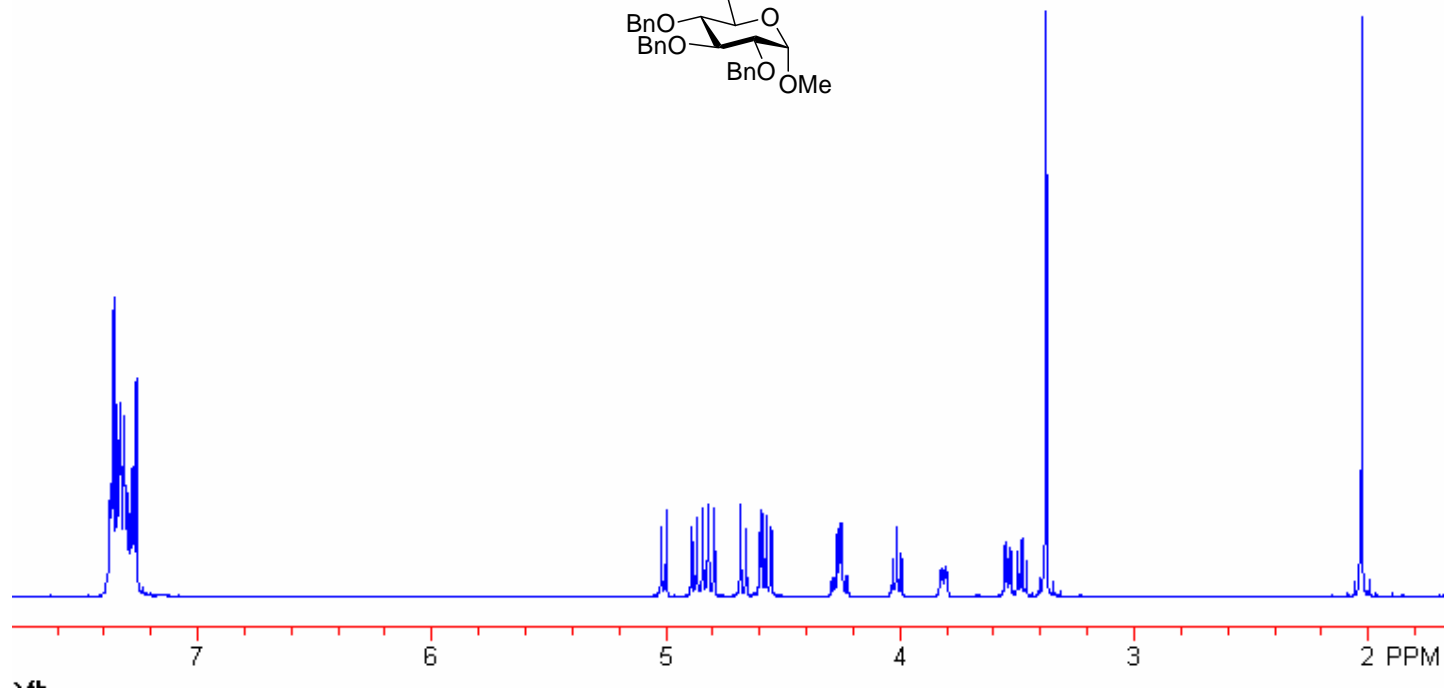

(19)

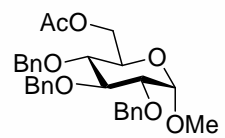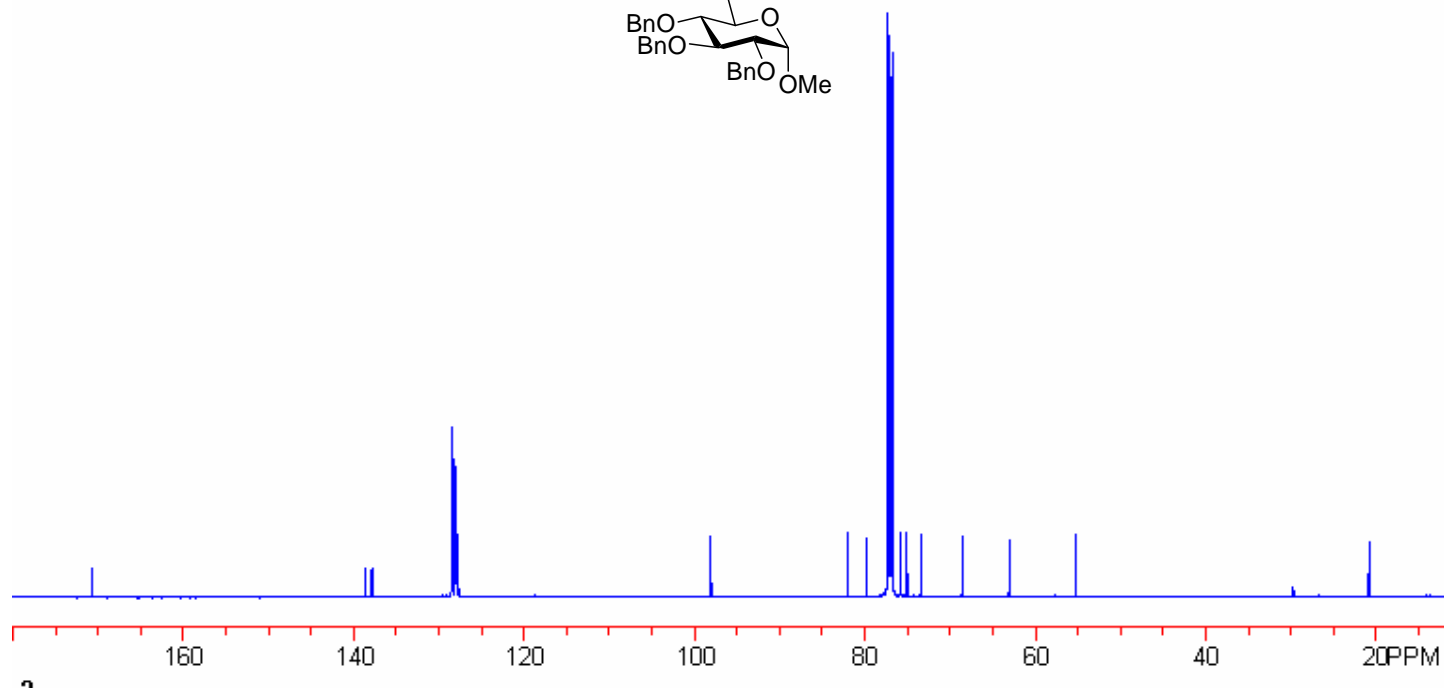

Supplement: NIHMS10997-supplement.pdf [file NIHMS10997-supplement.pdf]
